# Supplementary material for: Molecular tectonics: enantiomerically pure chiral crystals based on trans-1,2-cyclohexanediol
Source: Royal Society of Chemistry journal article supplement (doi:10.1039/c9ce00807a), 2019-01-01
Supplement: c9ce00807a1.pdf [file c9ce00807a1.pdf]

ESI

## Molecular tectonics: enantiomerically pure chiral crystals based on *trans*-1,2 cyclohexanediol

Benjamin Forquin,<sup>a</sup> Julien Berthaud,<sup>a</sup> Abdelaziz Jouaiti,<sup>a\*</sup> Nathalie Kyritskas,<sup>a</sup> Sylvie Ferlay,<sup>a\*</sup> Mir Wais Hosseini<sup>a\*</sup>

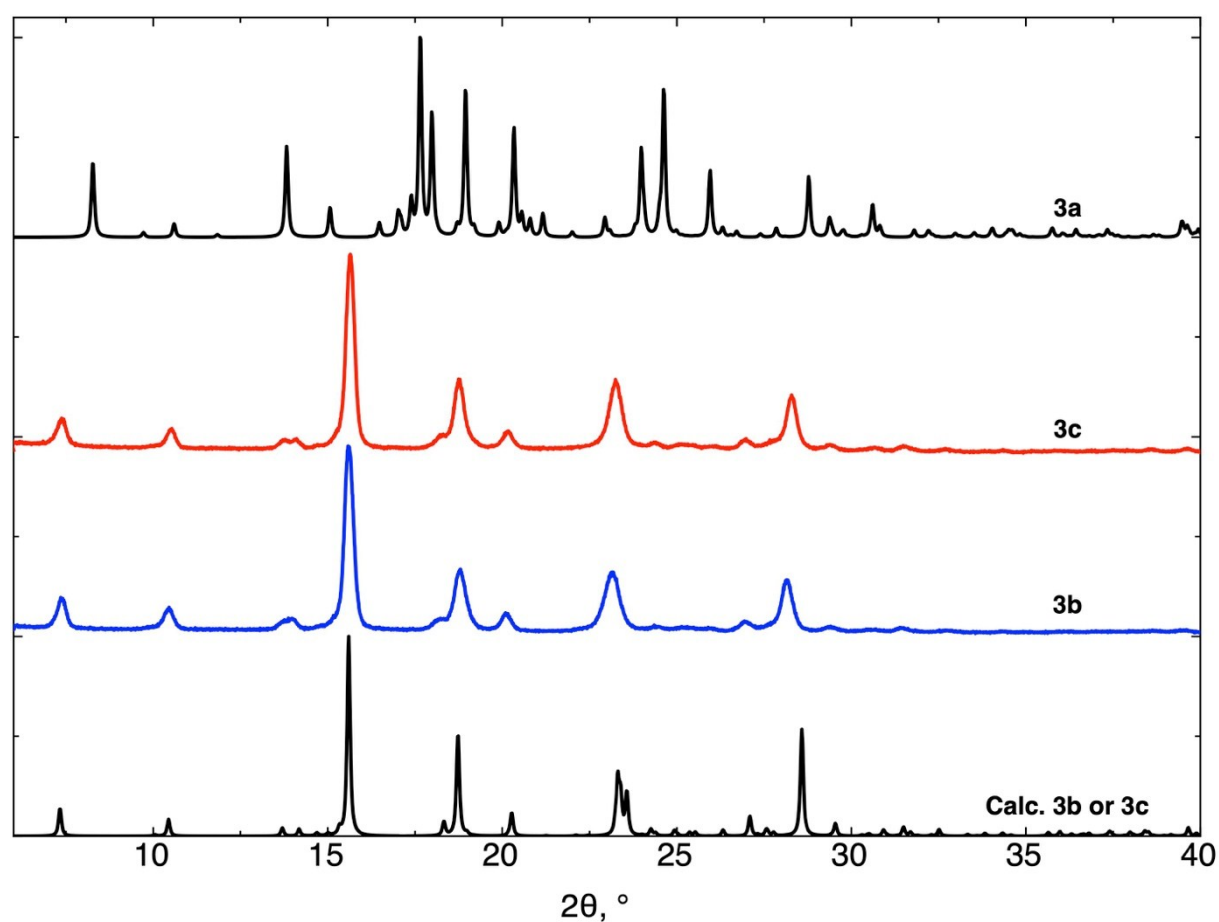

**Figure S1:** XRPD patterns calculated from single crystal data, for compounds **3b** (or **3c**) (in black, bottom), experimental of the microcrystalline powder of **3b** and **3c** (in blue and red, respectively) and calculated for **3a** from single crystal data.

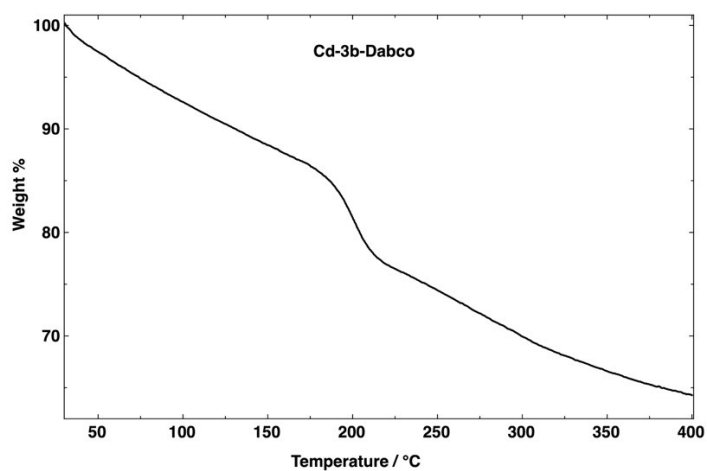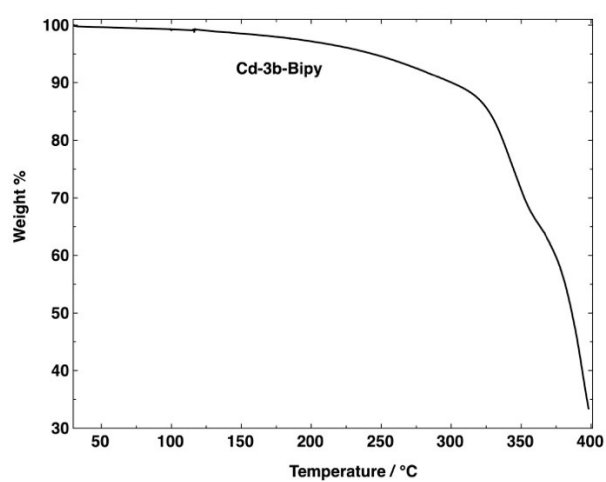

**Figure S2:** TGA traces (heat of rate 7°C/mn) for **Cd-3b-Dabco** and **Cd-3b-Bipy**
